# Supplementary material for: Effects of Different Livestock Grazing on Foliar Fungal Diseases in an Alpine Grassland on the Qinghai–Tibet Plateau
Source: MDPI journal article supplement (doi:10.3390/jof9090949), 2023-09-20
Supplement: s1 [file s1]

## Supporting Information

**Table S1.** Pathogen load [community pathogen load (*l*); *Cyperaceae* pathogen load (*Cl*); Forb pathogen load (*Fl*); Grass pathogen load (*Gl*); Legume pathogen load (*Ll*)] and community disease proneness (*p*) (g; mean  $\pm$  SE) under no grazing (CK), sheep grazing (SG), yak grazing (YG), and mixed grazing by yak and sheep (MG) treatments.

| Grazing treatment | <i>l</i>      | <i>p</i>       | <i>Cl</i>      | <i>Fl</i>     | <i>Gl</i>     | <i>Ll</i>       |
|-------------------|---------------|----------------|----------------|---------------|---------------|-----------------|
| CK                | 9.4 $\pm$ 0.6 | 11.5 $\pm$ 0.3 | 24.3 $\pm$ 1.0 | 1.7 $\pm$ 0.2 | 7.8 $\pm$ 0.6 | 0.1 $\pm$ 0.1   |
| SG                | 5.4 $\pm$ 0.8 | 10.3 $\pm$ 0.4 | 16.7 $\pm$ 1.7 | 1.1 $\pm$ 0.1 | 3.2 $\pm$ 0.3 | 0.04 $\pm$ 0.02 |
| YG                | 5.4 $\pm$ 0.4 | 10.6 $\pm$ 0.5 | 16.6 $\pm$ 1.1 | 1.0 $\pm$ 0.1 | 4.5 $\pm$ 0.3 | 0.03 $\pm$ 0.02 |
| MG                | 4.8 $\pm$ 0.8 | 8.8 $\pm$ 0.3  | 13.2 $\pm$ 0.7 | 0.8 $\pm$ 0.1 | 3.5 $\pm$ 0.4 | 0.00 $\pm$ 0.00 |

**Table S2.** Plant community characteristics [Shannon-weiner index (*H'*); Pielou's evenness index (*Je*); species richness (SR); plant total coverage (PTC); plant aboveground biomass (PAB)] (g; mean  $\pm$  SE) under no grazing (CK), sheep grazing (SG) yak grazing (YG), and mixed grazing by yak and sheep (MG) treatments.

| Grazing treatment | <i>H'</i>     | <i>Je</i>     | SR             | PTC            | PAB              |
|-------------------|---------------|---------------|----------------|----------------|------------------|
| CK                | 2.3 $\pm$ 0.1 | 0.9 $\pm$ 0.0 | 12.9 $\pm$ 0.2 | 94.0 $\pm$ 2.0 | 200.1 $\pm$ 25.4 |
| SG                | 2.2 $\pm$ 0.1 | 0.8 $\pm$ 0.0 | 12.8 $\pm$ 0.4 | 79.3 $\pm$ 0.3 | 213.3 $\pm$ 13.7 |
| YG                | 2.2 $\pm$ 0.0 | 0.8 $\pm$ 0.0 | 14.7 $\pm$ 0.5 | 78.8 $\pm$ 2.4 | 245.1 $\pm$ 13.0 |
| MG                | 1.9 $\pm$ 0.1 | 0.8 $\pm$ 0.1 | 12.8 $\pm$ 1.1 | 76.2 $\pm$ 1.7 | 186.0 $\pm$ 28.5 |
